# Supplementary material for: Assessing Locations Susceptible to Landslide Initiation During Prolonged Intense Rainfall in the Lares, Utuado, and Naranjito Municipios of Puerto Rico
Source: Copernicus journal article supplement (doi:10.5194/nhess-2023-185), 2023-11-10
Supplement: Supplementary file 1 [file nhess-2023-185-supplement.zip]

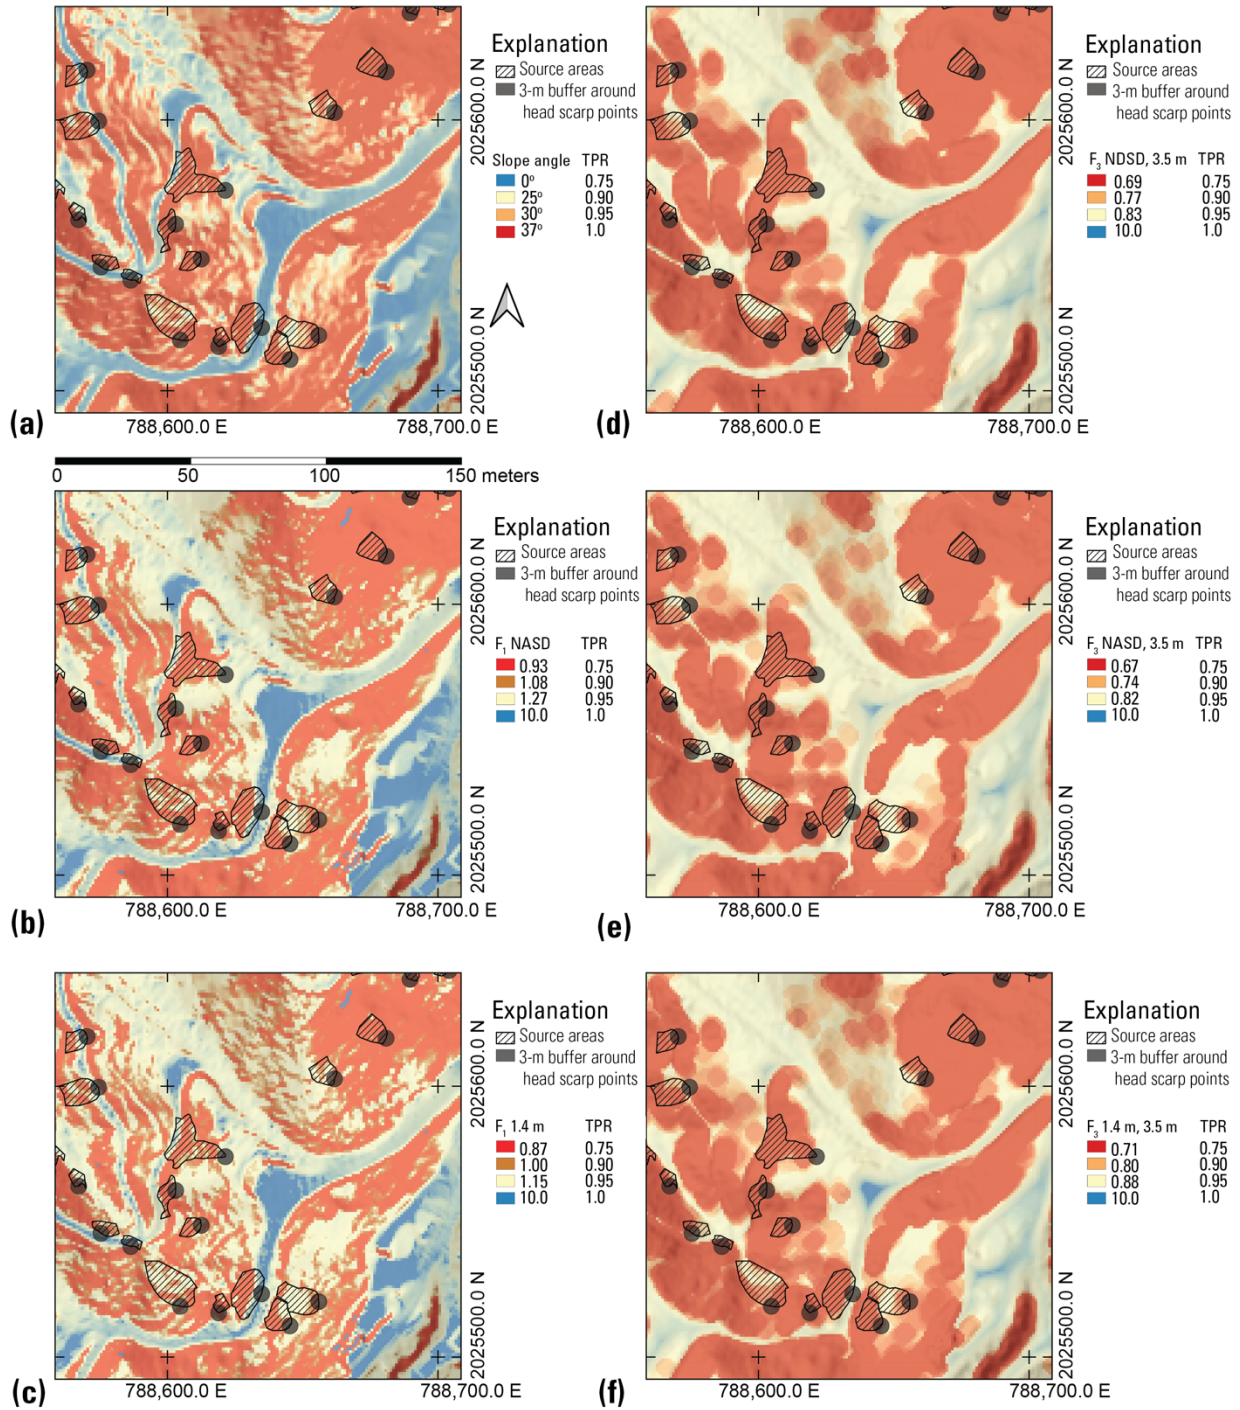

**Figure S3.** Enlarged view of inset map area of Figures 10 and 11 comparing slope categories to one-dimensional (1D) and quasi-three-dimensional (3D) susceptibility model results, (a) slope categories, (b) 1D factor of safety,  $F_1$ , for modified NASD soil-depth model (Fig. 10a), (c)  $F_1$  for constant soil depth of 1.4 m (Fig. 10b), (d) 3D factor of safety,  $F_3$ , for NDSD soil-depth model, (e)  $F_3$  for modified NASD soil-depth model (Fig. 11a), (f)  $F_3$  for constant soil depth of 1.4 m (Fig. 11b). Source areas are from Baxstrom et al (2021a) and head scarp points are from Hughes et al. 2019.
