# Supplementary material for: Assessing Locations Susceptible to Landslide Initiation During Prolonged Intense Rainfall in the Lares, Utuado, and Naranjito Municipios of Puerto Rico
Source: Copernicus journal article supplement (doi:10.5194/nhess-2023-185), 2023-11-10
Supplement: Supplementary file 2 [file nhess-2023-185-supplement.zip]

Archive with 3 entries (3 files):
- Fig_S1.jpg
- Fig_S2.jpg
- Fig_S3.pdf
