# Supplementary figures and images for: Assessing Locations Susceptible to Landslide Initiation During Prolonged Intense Rainfall in the Lares, Utuado, and Naranjito Municipios of Puerto Rico
Source: Copernicus journal article supplement (doi:10.5194/nhess-2023-185), 2023-11-10

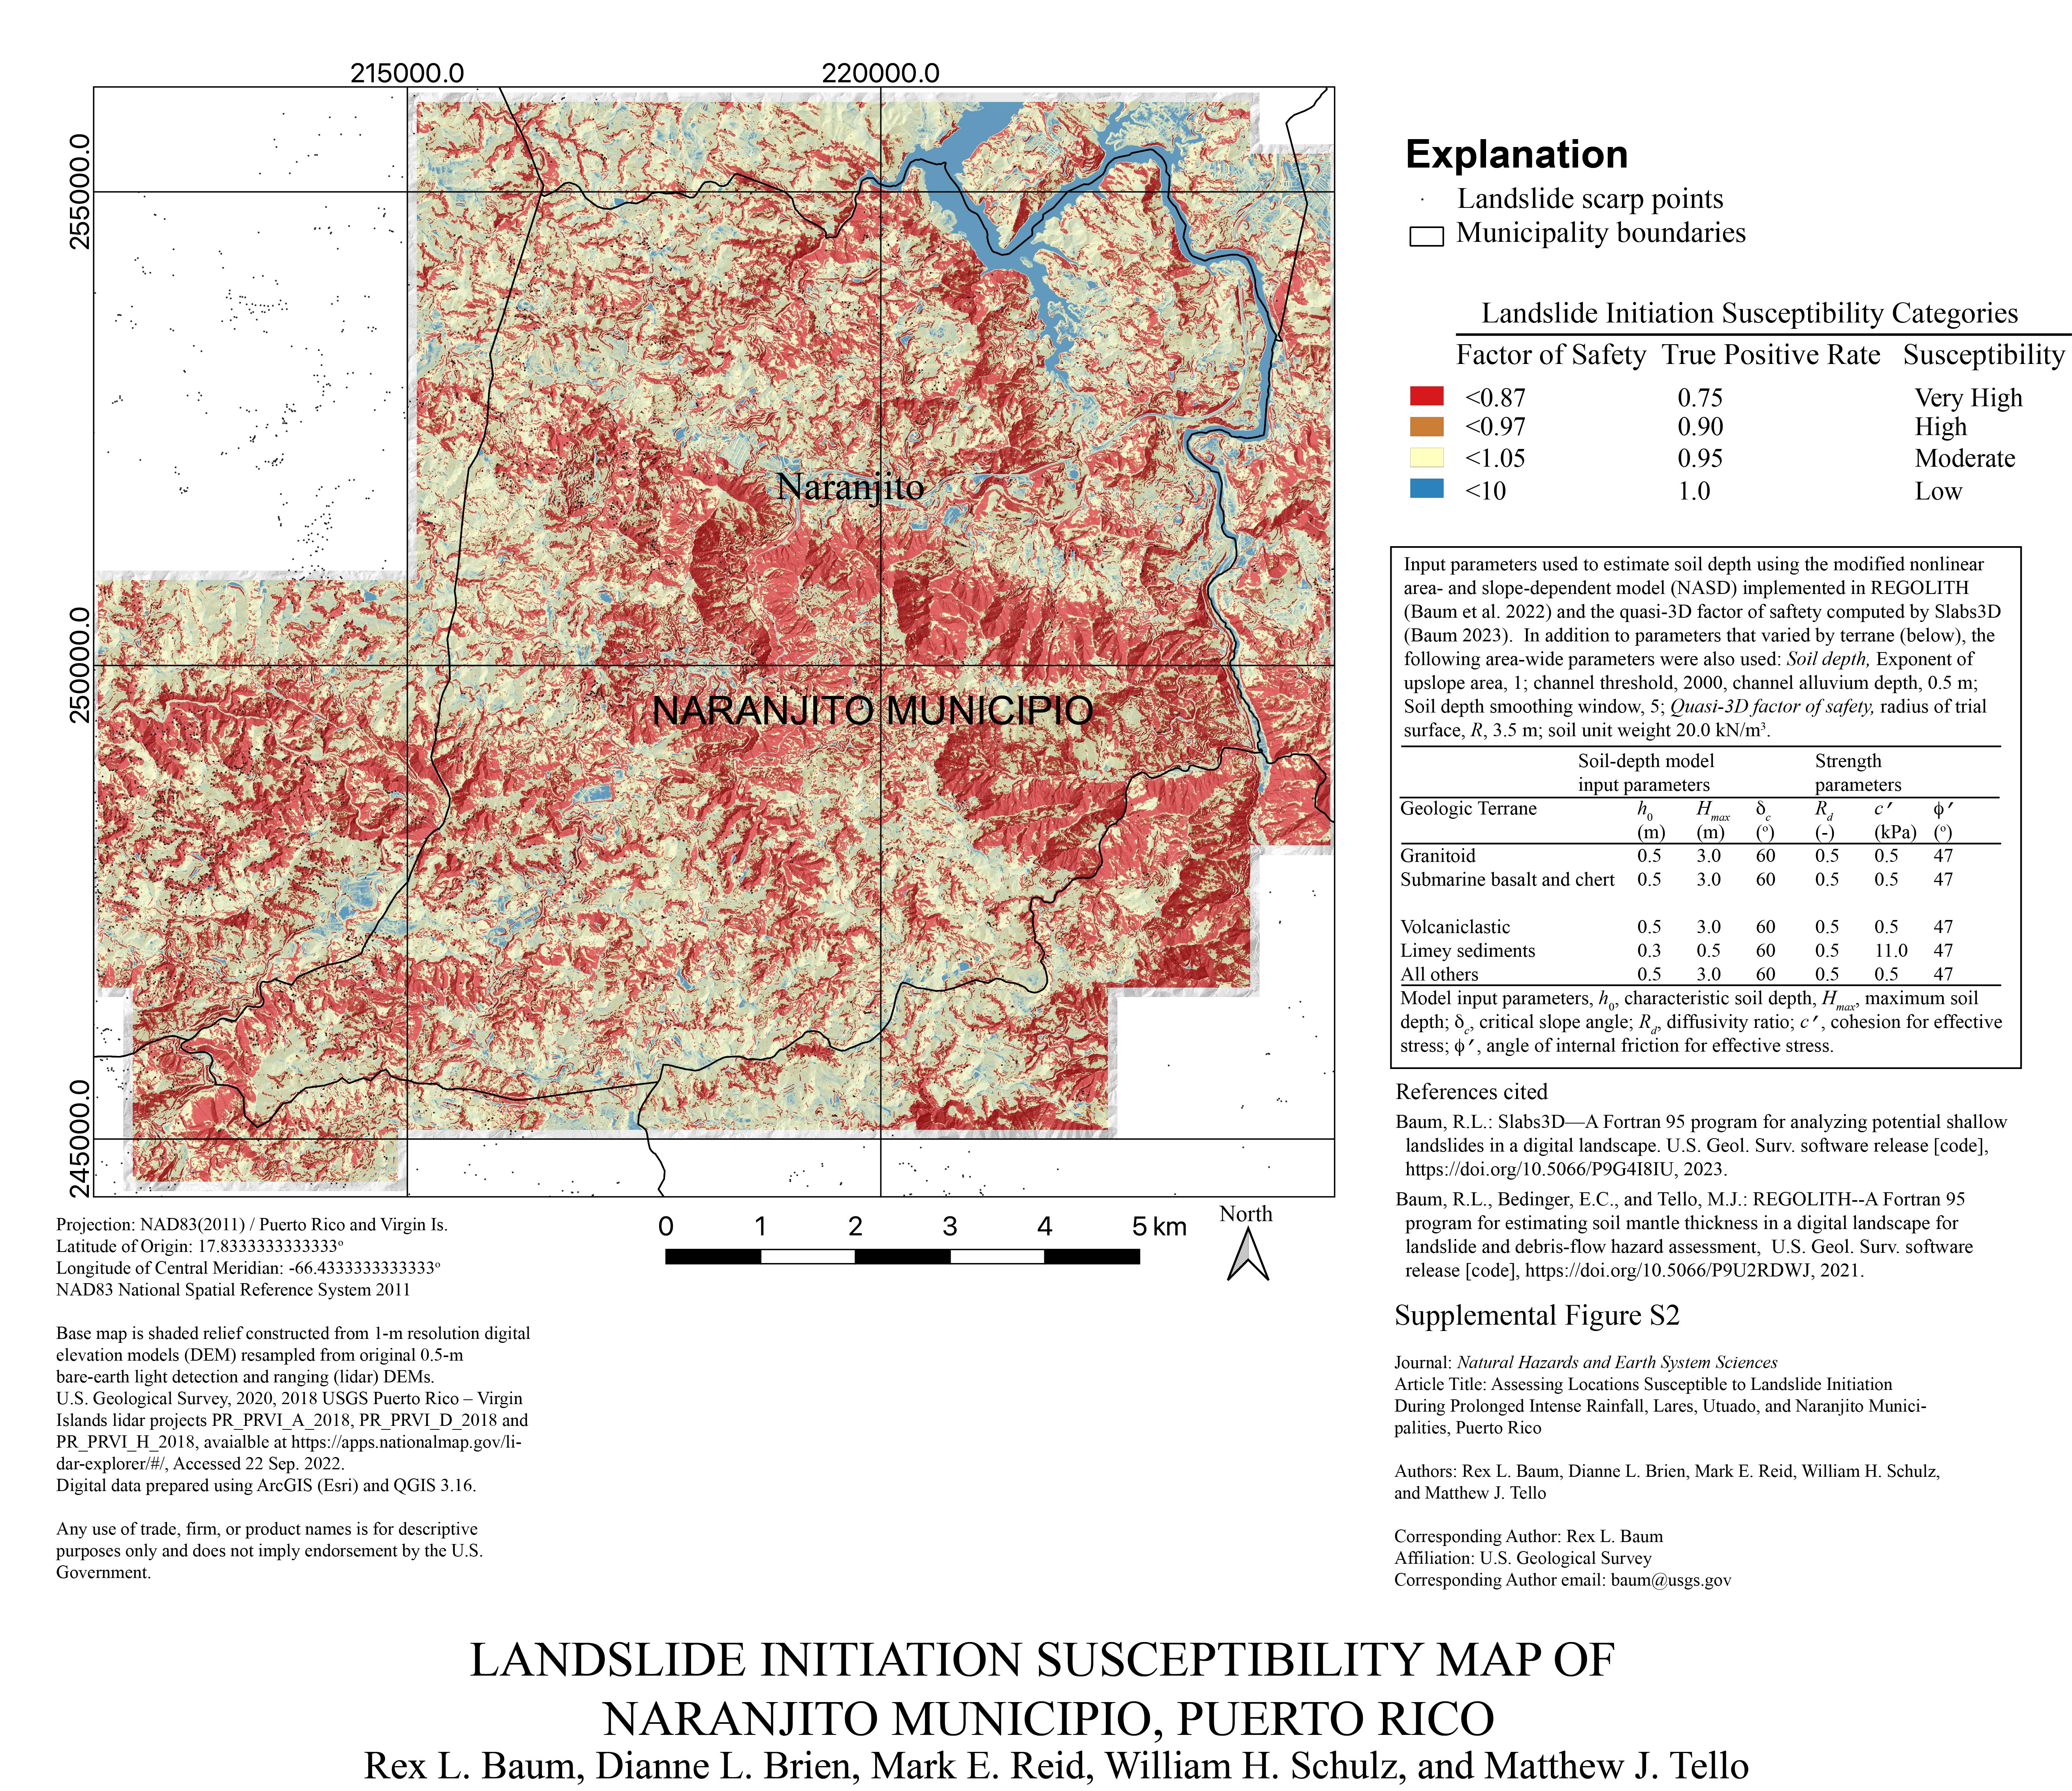

Supplement: Supplementary file 2 [file nhess-2023-185-supplement.zip › Fig_S2.jpg]
